# Supplementary material for: On new N-heterocyclic carbene derived alkylidene imidazolines
Source: Royal Society of Chemistry journal article supplement (doi:10.1039/b921655c), 2010-01-01
Supplement: b921655c.pdf [file b921655c.pdf]

## **On New N-Heterocyclic Carbene Derived Alkylidene Imidazolines**

Christiane E. I. Knappke, Jörg M. Neudörfl, and Axel Jacobi von Wangelin\*

*Department of Chemistry  
University of Cologne  
Greinstr. 4, 50939 Köln, Germany  
Fax: (+) 49 (0)221 470 5057  
E-mail: axel.jacobi@uni-koeln.de*

## Selected NMR Spectra

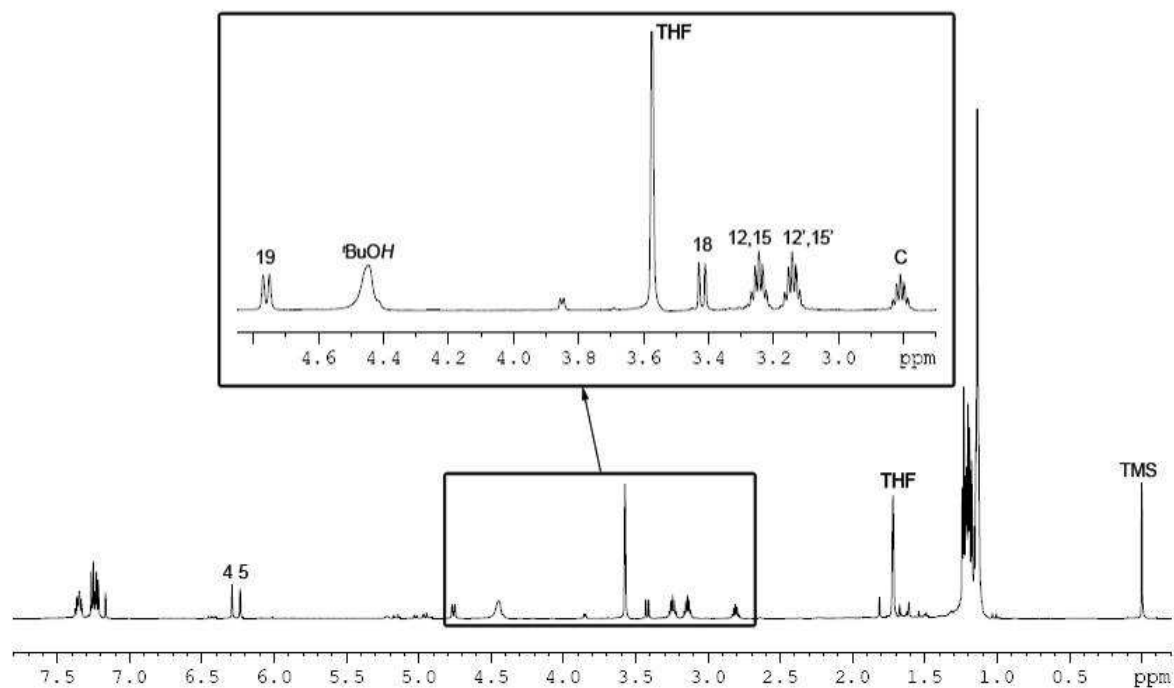

Figure S1: <sup>1</sup>H NMR of compound 5

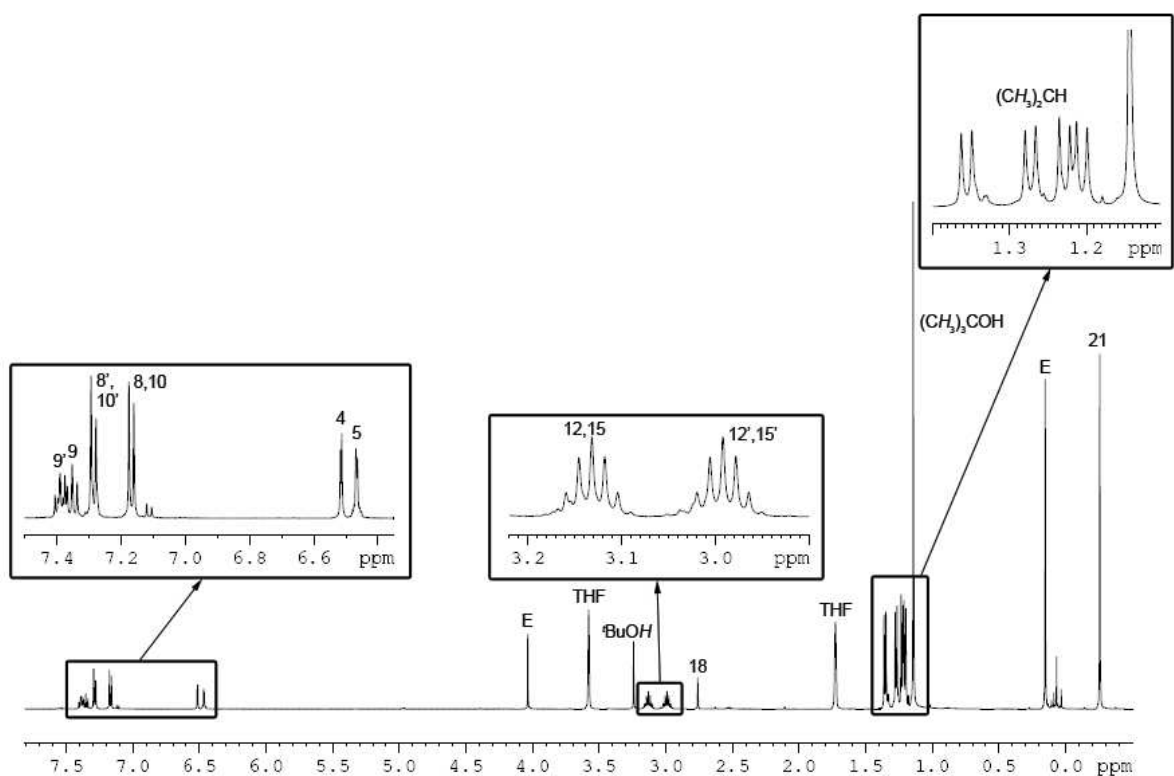

Figure S2: <sup>1</sup>H NMR of compound 6 (signals assigned with "E" belong to the electrophile, here: trimethylsilylpropargyl bromide)

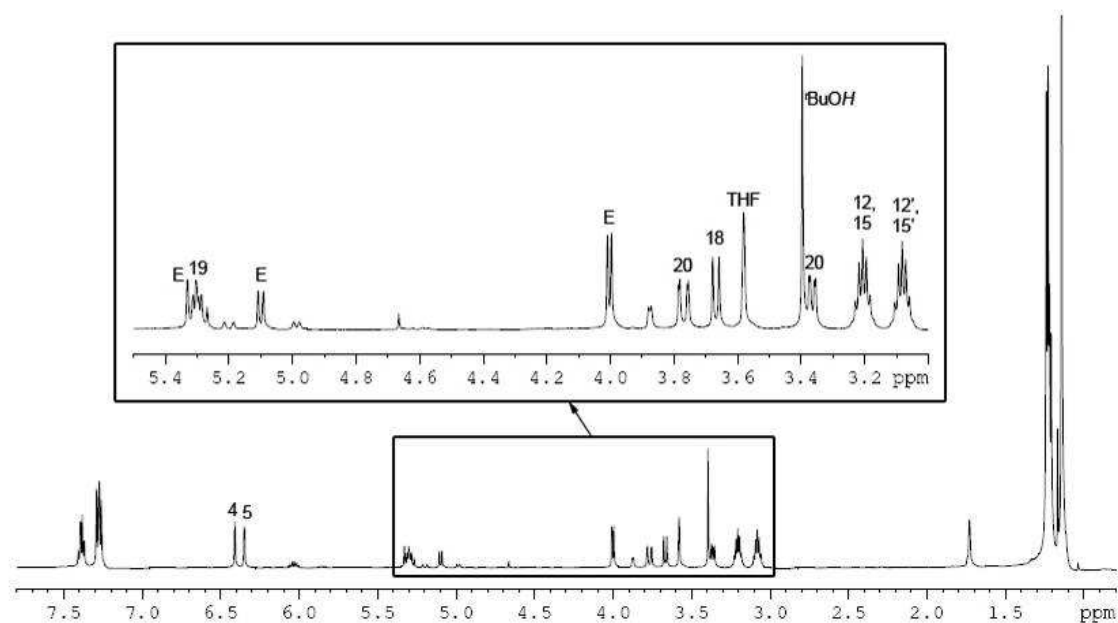

Figure S3: <sup>1</sup>H NMR of compound 8

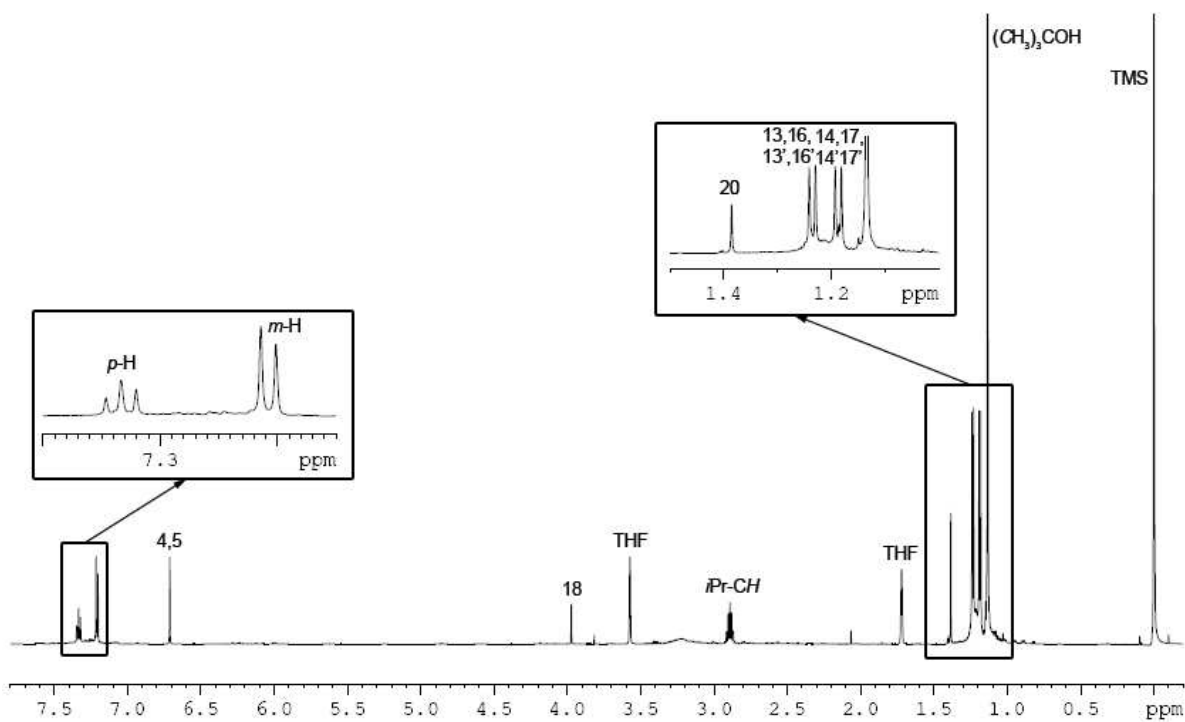

Figure S4: <sup>1</sup>H NMR of compound 9

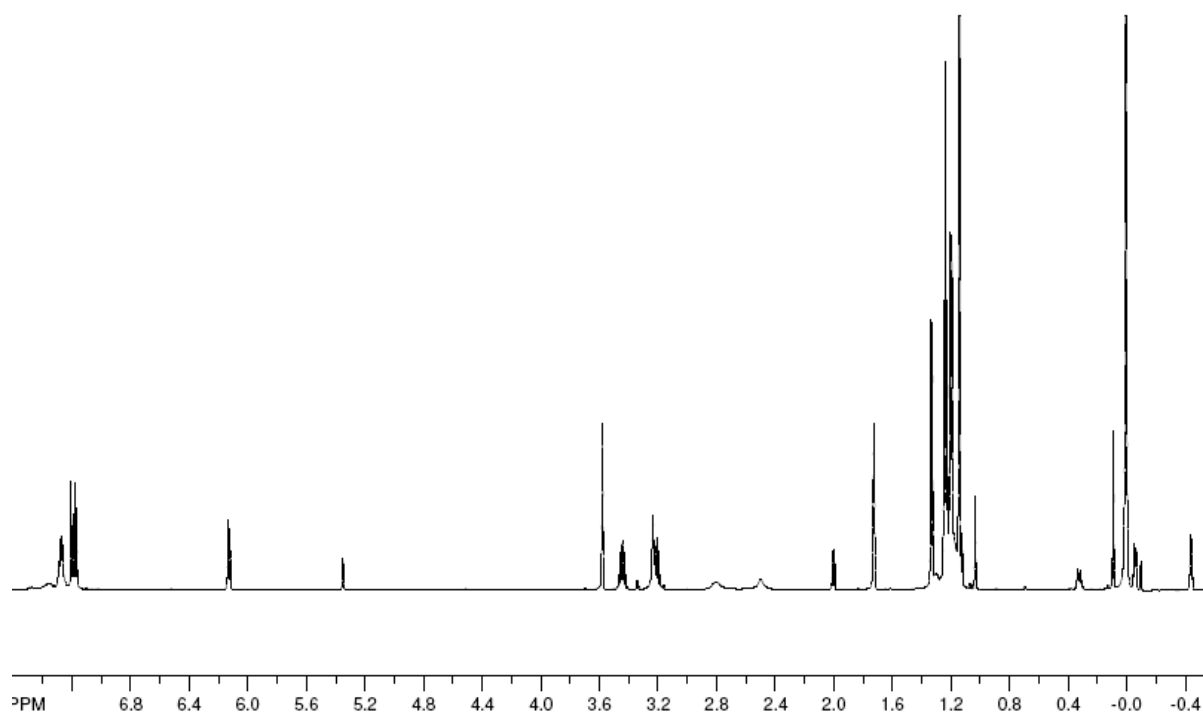

Figure S5:  $^1\text{H}$  NMR of compound **10**

## UV/Vis Investigation

UV/Vis spectroscopy showed nearly the same absorption maxima (230-238 nm) for *p*-methylbenzyl bromide, carbene **2**, and imidazolium salt **3**. Enediamine **4** exhibited a strong red-shifted band at 350 nm.

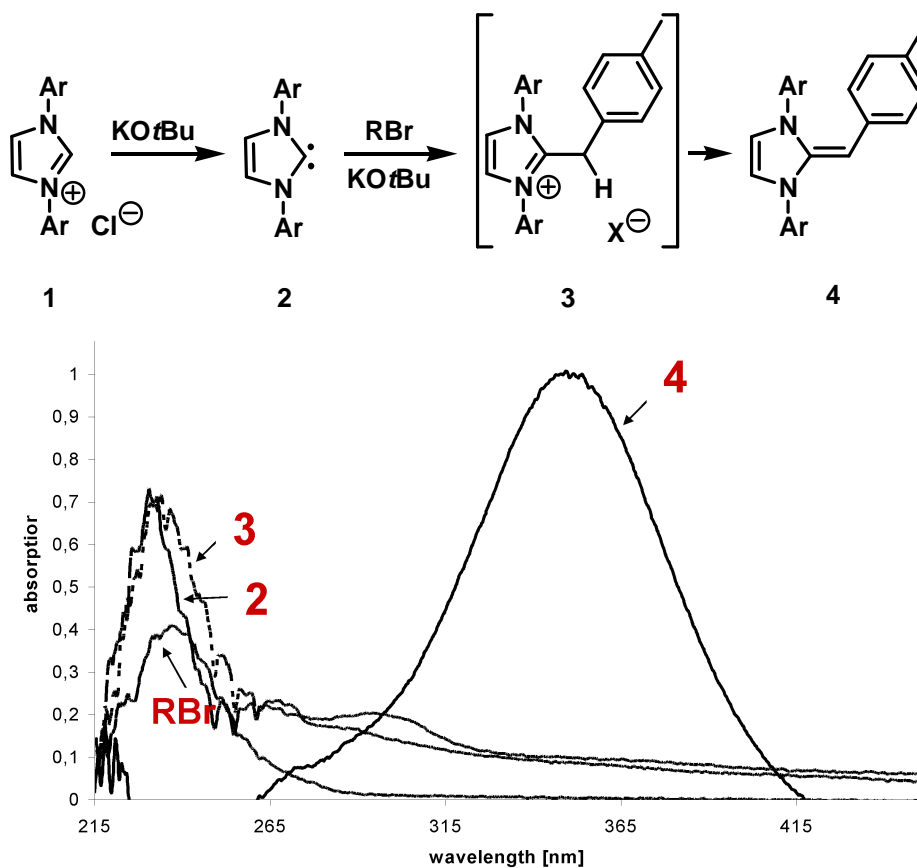

Figure S6: UV/Vis spectra of carbene **2**, imidazolium iodide **3**, enediamine **4** and *p*-methylbenzyl bromide (RBr). Ar = 2,6-diisopropylphenyl.

## Crystal Structures

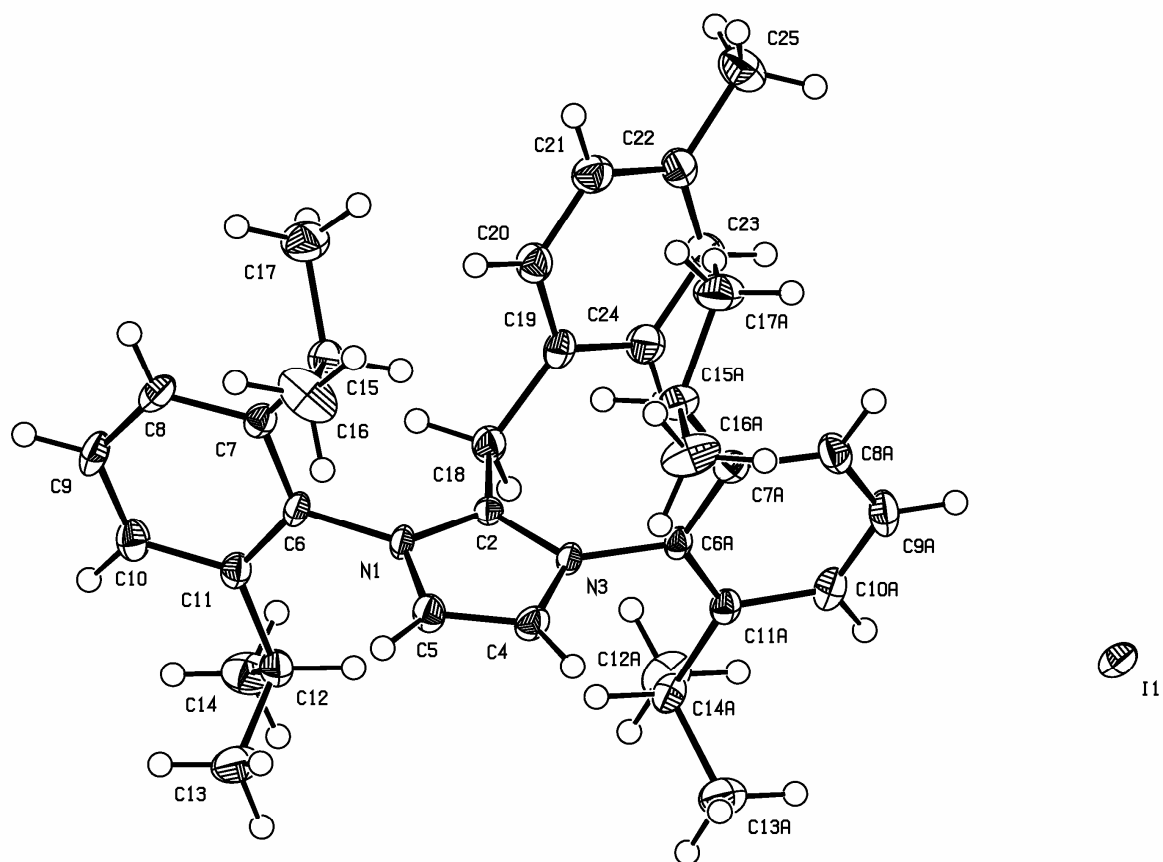

Figure S7: Crystal structure of imidazolium iodide **3** (ellipsoids at 50% probability).

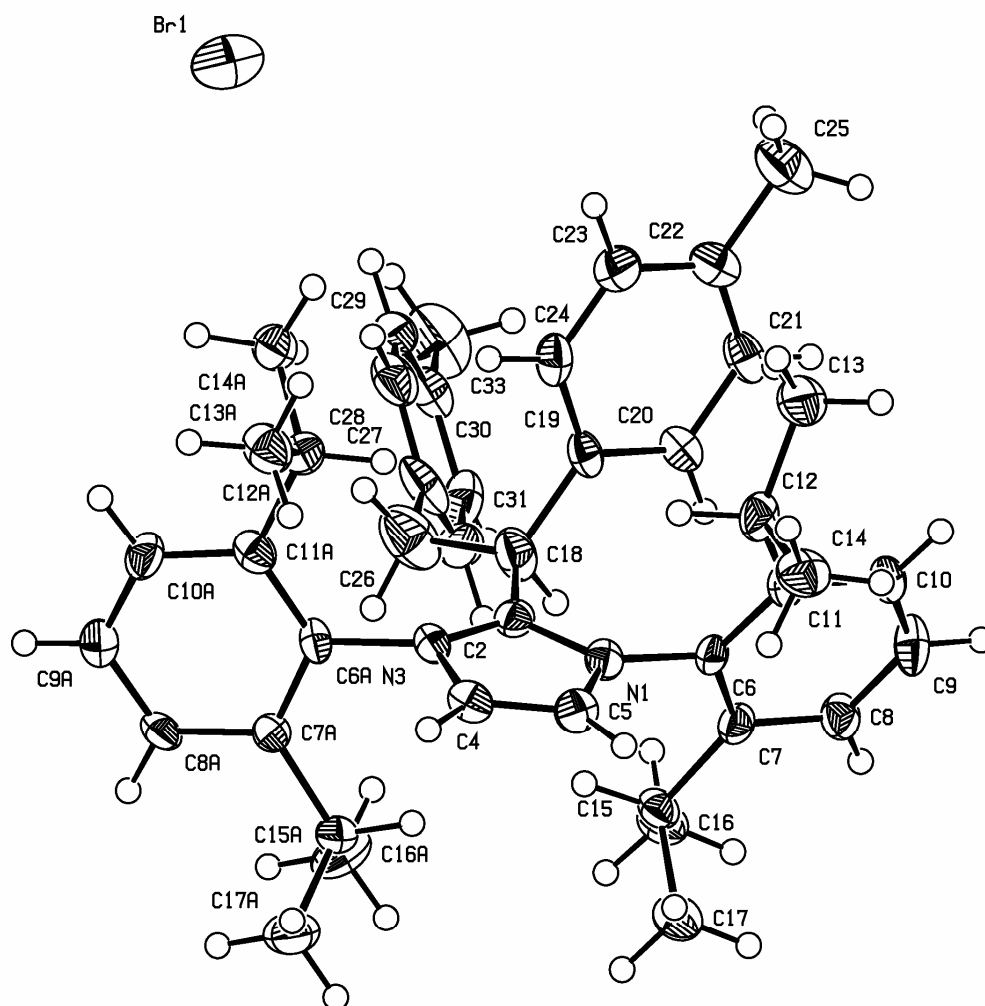

Figure S8: Crystal structure of imidazolium bromide **16** (ellipsoids at 50% probability).

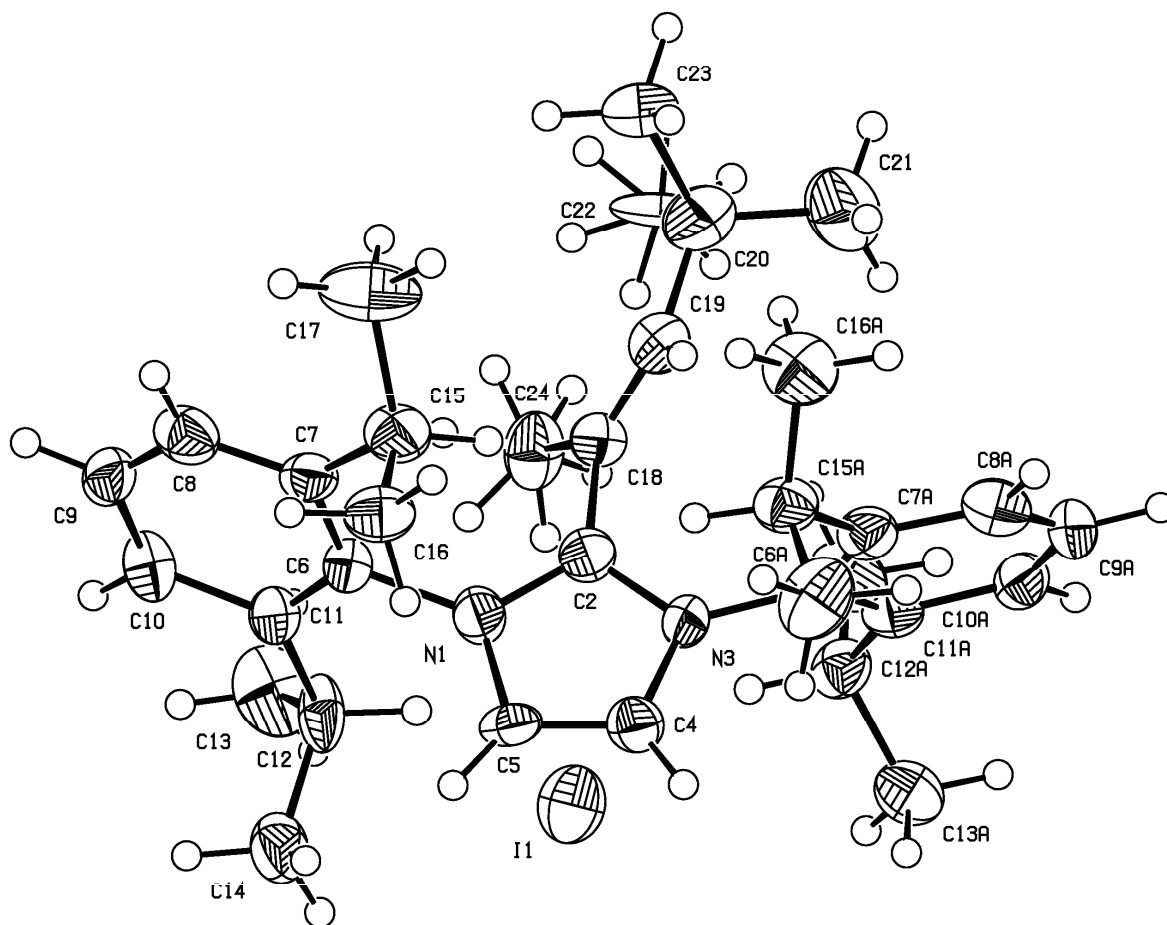

Figure S9: Crystal structure of imidazolium iodide **19** (ellipsoids at 50% probability).



## Proposed mechanism for the reaction of carbene 2 with epibromohydrin

In the reaction of epibromohydrin with **1** in the presence of 2 equivalents KO<sup>t</sup>Bu surprisingly 2-propanonylidene **9** was formed. This compound contains a methyl vinyl ketone moiety<sup>1</sup> and was presumably formed via *t*-butoxide-mediated ring-opening of the intermediate imidazolylidene-methyl oxirane (Fig. S11). The mechanism is supported by the following observations: a) simple epoxides (methyl oxirane, styrene oxide, *t*-butoxymethyl oxirane) were unreactive toward **2** under identical conditions; b) epichlorohydrin also afforded **9** albeit at slower rate; c) epibromohydrin was not prone to isomerization to bromoacetone under basic (KO<sup>t</sup>Bu) conditions; d) with non-nucleophilic NaH as base **9** was not formed. As a by product methylene adduct **28** was observed.<sup>2</sup>

Alternatively a mechanism, that involves intramolecular epoxide opening via formation of a cyclopropanolate can be discussed.

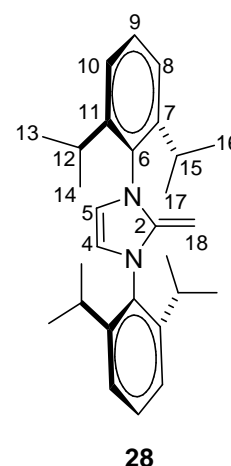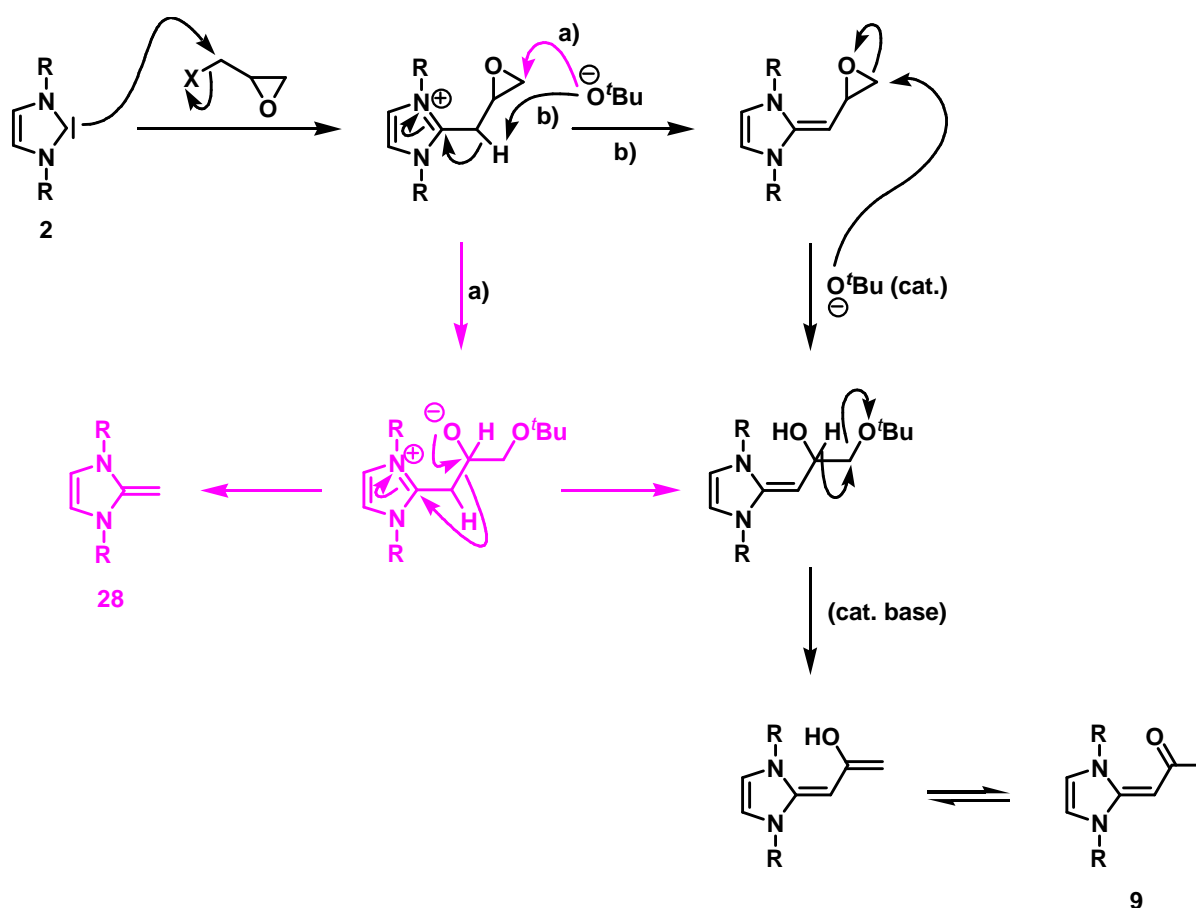

Figure S10: Proposed mechanism for the reaction of carbene **2** with epibromohydrin.

<sup>1</sup> For structurally related compounds, see also: (a) A. Fürstner, M. Alcarazo, R. Goddard, C. W. Lehmann, *Angew. Chem.* **2008**, *120*, 3254-3258; *Angew. Chem. Int. Ed.* **2008**, *47*, 3210-3214; (b) J. Bourson, *Bull. Soc. Chim. Fr.* **1971**, 152-159.

<sup>2</sup> <sup>1</sup>H-NMR (600 MHz, THF-*d*<sub>8</sub>): δ = 7.33 (m; 2H, H-9), 7.23 (m; 4H, H-8, H-10), 6.24 (s; 2H, H-4, H-5), 3.20 (sep; 4H, <sup>3</sup>J<sub>HH</sub> = 6.9 Hz, H-12, H-15), 1.91 (s; 2H, H-18), 1.27-1.10 (m; 24H, H-13, H-14, H-16, H-17); <sup>13</sup>C-NMR (151 MHz, THF-*d*<sub>8</sub>): δ = 153.1 (d; 1C, C2), 149.5 (d; 4C, C7, C11), 135.51 (d; 2C, C6), 129.6 (u; 2C, C9), 124.9 (u; 4C, C8, C10), 115.4 (u; 2C, C4, C5), 43.6 (d; 1C, C18), 29.2 (u; 4C, C12, C15), 24.4 (u; 4C, C13, C16), 24.0 (u; 4C, C14, C17); ESI-MS: m/z: 403.00 [M+H]<sup>+</sup>.
